# Supplementary material
Source: PubMed Central journal article supplement (PMC3017259)
Supplement: 090379_1.pdf [file 090379_1.pdf]

**Appendix 1: Common presentations and causes of red eye**

- Light sensitivity: Iritis, keratitis, corneal abrasion or ulcer
- Unilateral symptoms: Above + herpetic eye disease, acute glaucoma
- Significant pain: Above + scleritis
- White spot on cornea: Corneal ulcer
- Nonreactive pupil: Acute glaucoma, iritis
- Blurred vision: All of the above
